# Supplementary material for: Remediation and recycling of inorganic acids and their green alternatives for sustainable industrial chemical processes
Source: Royal Society of Chemistry journal article supplement (doi:10.1039/d3va00112a), 2023-01-01
Supplement: d3va00112a1.pdf [file d3va00112a1.pdf]

<sup>†</sup>Electronic supplementary information (ESI)

**Remediation and recycling of inorganic acids and their green alternatives  
for the sustainable industrial chemical processes**

Chhavi Agarwal<sup>a,\*</sup> and Ashok K. Pandey<sup>a,b,1,\*</sup>

<sup>a</sup>Radiochemistry Division, Bhabha Atomic Research Centre, Trombay, Mumbai-400085,  
India

<sup>b</sup>K.C. College, HSNC University, Mumbai, India

**Fig. S1.** Schematic illustration of general working principle of membrane distillation process.

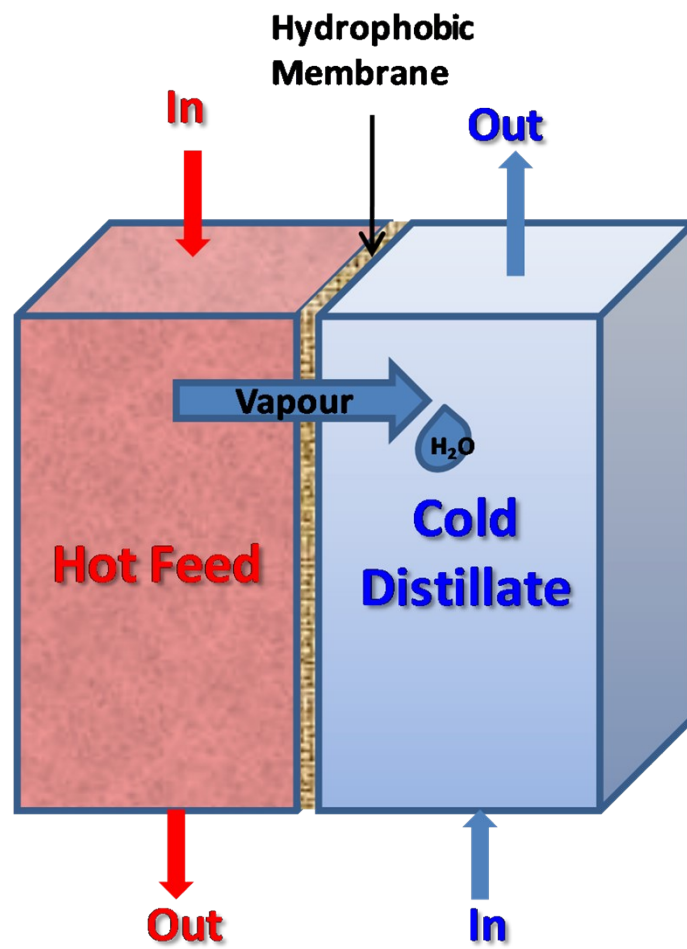

**Fig.S2.** Conceptual representation of Process Flow Diagram (PFD) of the membrane-integrated process for the recoveries HCl, water and salts from a pickling solution. Adopted from Ref. 336.

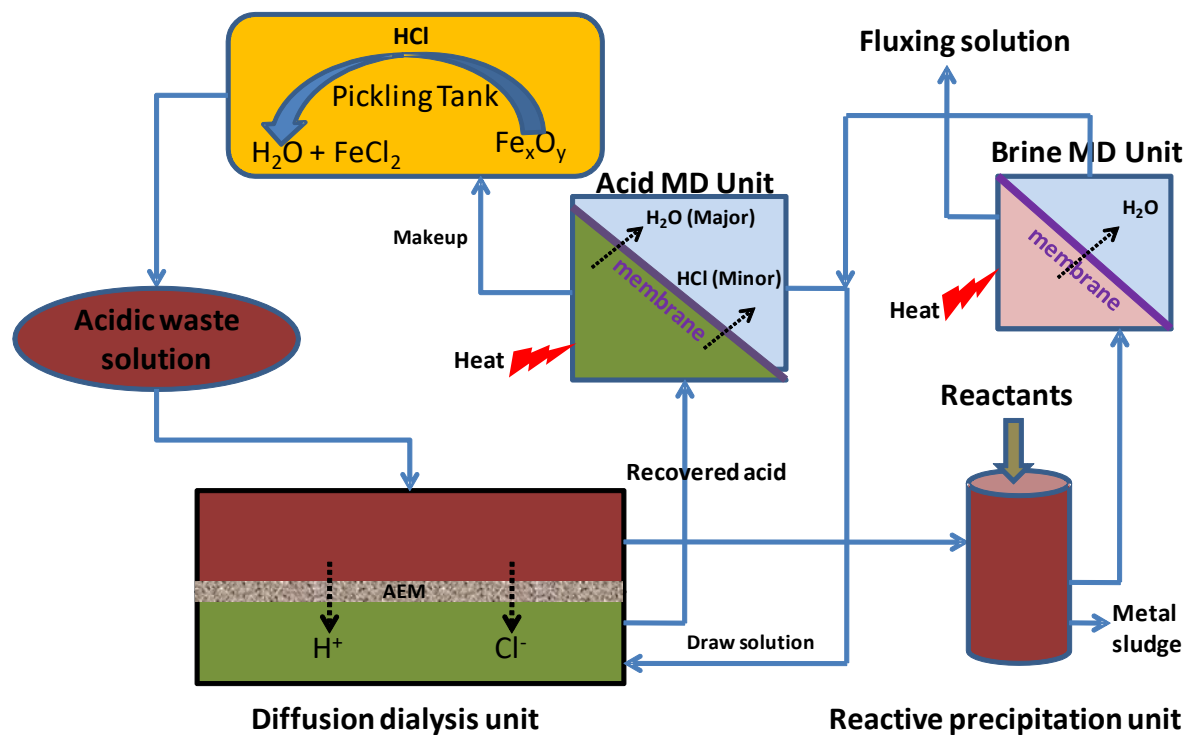

**Table S1.** Diffusion Dialysis studies and their major outcomes.

| <b>Title of the paper</b>                                                                                                              | <b>Aimed application/s system studied</b>                                | <b>Membrane composition</b>                                                                                                                          | <b>Major outcome</b>                                            | <b>Ref No.</b> |
|----------------------------------------------------------------------------------------------------------------------------------------|--------------------------------------------------------------------------|------------------------------------------------------------------------------------------------------------------------------------------------------|-----------------------------------------------------------------|----------------|
| Recovery of H <sub>2</sub> SO <sub>4</sub> from waste acid solution by a diffusion dialysis method                                     | H <sub>2</sub> SO <sub>4</sub> recovery in diamond manufacturing process | Selemion DSV                                                                                                                                         | Process found to be feasible and economically viable            | 1              |
| Hybrid organic-inorganic anion-exchange pore-filled membranes for the recovery of nitric acid from highly acidic aqueous waste streams | High level nuclear waste                                                 | PP host with pores filled with polymerized [(3-Acrylamidopropyl) trimethyl ammonium chloride (APMAC) and (3-acryloxypropyl)trimethoxysilane (APTMS)] | Could be successfully demonstrated with simulated waste         | 2              |
| Tuning the acid recovery performance of poly(4-vinylpyridine)-filled membranes by the introduction of hydrophobic groups               | HCl/NaCl/Mg Cl <sub>2</sub>                                              | 4-vinylpyridine based PP AEM                                                                                                                         | Performance better than commercial membranes                    | 3              |
| Fabrication of asymmetrical diffusion dialysis membranes for rapid acid recovery with high purity                                      | HCl/FeCl <sub>2</sub>                                                    | brominated poly(phenylene oxide) (BPPO) ultrafiltration membranes with a thin active layer (< 1 micron mm thick)                                     | Process capacity increased with 3 times increase in acid purity | 4              |

|                                                                                                                      |                                                                                                          |                                                                                                                                                             |                                                                                              |   |
|----------------------------------------------------------------------------------------------------------------------|----------------------------------------------------------------------------------------------------------|-------------------------------------------------------------------------------------------------------------------------------------------------------------|----------------------------------------------------------------------------------------------|---|
| Imidazolium functionalized anion exchange membrane blended with PVA for acid recovery via diffusion dialysis process | HCl/FeCl <sub>2</sub>                                                                                    | Imidazole based membrane prepared by sol-gel process                                                                                                        | Higher S than commercial DF-120 membrane                                                     | 5 |
| One-step fabrication of methylthiazole-functionalized anion exchange membranes for diffusion dialysis                | Iron polishing waste solution (1.0 mol·L <sup>-1</sup> FeCl <sub>2</sub> + 0.2 mol·L <sup>-1</sup> HCl)  | brominated poly(2,6-dimethyl-1,4-phenylene oxide) (BPPO) based membranes with 4-methylthiazole functional groups                                            | U <sup>H+</sup> and S much higher than commercial DF-120                                     | 6 |
| In-situ cross-linked porous anion exchange membranes with high performance for efficient acid recovery               | Industrial acid water with HCl (1 mol L <sup>-1</sup> ) and FeCl <sub>2</sub> (0.2 mol L <sup>-1</sup> ) | Chloromethyl polyethersulfone substrate using N, N, N', N'', N''-pentamethyldiethylenetriamine as a bifunctional agent for cross-linking and quaternization | Membrane synthesis by one-pot method S two orders of magnitude higher than commercial DF-120 | 7 |
| Facile surface modification of anion-exchange membranes for improvement of diffusion dialysis performance            | HCl (1 mol L <sup>-1</sup> ) and FeCl <sub>2</sub> (0.2 mol L <sup>-1</sup> )                            | Neosepta-AF modified with polypyrrole                                                                                                                       | S improved with respect to pristine membrane                                                 | 8 |
| Recovery of H <sub>2</sub> SO <sub>4</sub> from an acid leach solution by diffusion dialysis                         | H <sub>2</sub> SO <sub>4</sub> from an acid leach solution produced                                      | DF120                                                                                                                                                       | economic evaluation revealed that an                                                         | 9 |

|                                                                                                                                                    |                                                                                                               |                                                                                                                                |                                                                                                                |    |
|----------------------------------------------------------------------------------------------------------------------------------------------------|---------------------------------------------------------------------------------------------------------------|--------------------------------------------------------------------------------------------------------------------------------|----------------------------------------------------------------------------------------------------------------|----|
|                                                                                                                                                    | during the vanadium manufacturing process                                                                     |                                                                                                                                | investment in this process could be recovered within 27 months                                                 |    |
| Recovery of hydrochloric acid from the waste acid solution by diffusion dialysis                                                                   | HCl/FeCl <sub>2</sub> /Zn Cl <sub>2</sub>                                                                     | DF120                                                                                                                          | Leakage of other salts observed                                                                                | 10 |
| Separation and recovery of sulfuric acid from acidic vanadium leaching solution by diffusion dialysis                                              | H <sub>2</sub> SO <sub>4</sub> from an acid leach solution produced during the vanadium manufacturing process | DF120                                                                                                                          | Efficient rejection of V, Al and Fe ions wrt H could be shown                                                  | 11 |
| Poly (triethoxyvinylsilane-co-quaternaryvinylbenzylchloride)/fGNR based anion exchange membrane and its application towards salt and acid recovery | HCl/FeCl <sub>2</sub>                                                                                         | triethoxyvinylsilane and quaternized vinyl benzyl chloride based AEM modified with functionalized graphene nano-ribbons (fGNR) | Reduction in swelling ratio and improvement in IEC due to functionalized graphene nano-ribbons (fGNR) presence | 12 |

|                                                                                                                                                |                                                                                          |                                                            |                                                                                |    |
|------------------------------------------------------------------------------------------------------------------------------------------------|------------------------------------------------------------------------------------------|------------------------------------------------------------|--------------------------------------------------------------------------------|----|
| Covalently cross-linked pyridinium based AEMs with aromatic pendant groups for acid recovery via diffusion dialysis                            | HCl/FeCl <sub>2</sub>                                                                    | covalently cross-linked pyridinium based AEMs              | performance better than commercial membranes                                   | 13 |
| The recovery of sulphuric acid from the waste anodic aluminum oxidation solution by diffusion dialysis                                         | Recovery of H <sub>2</sub> SO <sub>4</sub> from waste anodic aluminum oxidation solution | DF120                                                      | DD found to be cost effective                                                  | 14 |
| Recovery of hydrochloric acid from simulated chemosynthesis aluminum foil wastewater by spiral wound diffusion dialysis (SWDD) membrane module | HCl from simulated chemosynthesis aluminum foil wastewater                               | spiral wound diffusion dialysis (SWDD) membrane            | Investment could be recovered within 16.5 months                               | 15 |
| Effective recovery of acids from egg waste incorporated PSf membranes: A step towards sustainable development                                  |                                                                                          | egg shell membrane powder loaded on polysulfone membrane   | egg shell membrane powder enhances proton permeability of polysulfone membrane | 16 |
| Diffusion dialysis membranes with semi-interpenetrating network                                                                                |                                                                                          | semi-interpenetrating networks in polyvinyl chloride (PVC) | performance better than                                                        | 17 |

|                                                                                                                 |                                                          |                                                                                       |                                                                        |    |
|-----------------------------------------------------------------------------------------------------------------|----------------------------------------------------------|---------------------------------------------------------------------------------------|------------------------------------------------------------------------|----|
| for acid recovery                                                                                               |                                                          |                                                                                       | commercial membranes                                                   |    |
| Advanced charged porous membranes with ultrahigh selectivity and permeability for acid recovery                 | HCl/FeCl <sub>2</sub> /AlCl <sub>3</sub>                 | Porous brominated poly(2,6-dimethyl-1,4-phenylene oxide) (BPPO) membranes             | performance better than commercial membranes                           | 18 |
| Anion exchange membranes used in diffusion dialysis for acid recovery from erosive and organic solutions        | acid from organic solution containing HCl and glyphosate | quaternized poly(2,6-dimethyl-1,4-phenylene oxide) (QPPO) and polyvinyl alcohol (PVA) | Membranes less erosive and performance better than commercial membrane | 19 |
| Graphene oxide embedded “three-phase” membrane to beat “trade-off” in acid recovery                             | HCl/FeCl <sub>2</sub>                                    | Three phase graphene oxide sheet based AEMs                                           | Improved efficiency and separation                                     | 20 |
| Anion exchange membranes from hot-pressed electrospun QPPO–SiO <sub>2</sub> hybrid nanofibers for acid recovery | HCl/FeCl <sub>2</sub>                                    | quaternized poly(2,6-dimethyl-1,4-phenylene oxide)/Silicon dioxide hybrid material    | Performance better than commercial membranes                           | 21 |
| Porous diffusion dialysis                                                                                       | HCl/FeCl <sub>2</sub>                                    | brominated poly                                                                       | Performance                                                            | 22 |

|                                                                                                                          |                       |                                                                                                                     |                                                |    |
|--------------------------------------------------------------------------------------------------------------------------|-----------------------|---------------------------------------------------------------------------------------------------------------------|------------------------------------------------|----|
| membranes for rapid acid recovery                                                                                        |                       | (phenylene oxide) (BPPO) ultrafiltration membrane                                                                   | ce better than commercial membranes            |    |
| Porous BPPO-based membranes modified by aromatic amine for acid recovery                                                 | HCl/FeCl <sub>2</sub> | triphenylamine based porous (AEM with brominated poly(2,6-dimethyl-1,4-phenyleneoxide) (BPPO)                       | Performance comparable to commercial membranes | 23 |
| Novel quaternized aromatic amine based hybrid PVA membranes for acid recovery                                            | HCl/FeCl <sub>2</sub> | quaternized 4,4'-(1,10-bis(4,4'-oxydiphenyl)-4,4'-diyl)bis(4-aminophenyl) (QBAPB) polyvinyl alcohol (PVA) based AEM | Performance better than commercial membranes   | 24 |
| Asymmetrically porous anion exchange membranes with an ultrathin selective layer for rapid acid recovery                 | HCl/FeCl <sub>2</sub> | Asymmetric ultrafiltration membrane with a skin layer                                                               | Performance better than commercial membranes   | 25 |
| Improved acid recovery performance by novel Poly(DMAEM-co- $\gamma$ -MPS) anion exchange membrane via diffusion dialysis | HCl/FeCl <sub>2</sub> | Novel membranes prepared by free radical polymerization                                                             | Performance better than commercial             | 26 |

|                                                                                                                                  |                                                        |                                                                                           |                                                                                                                               |    |
|----------------------------------------------------------------------------------------------------------------------------------|--------------------------------------------------------|-------------------------------------------------------------------------------------------|-------------------------------------------------------------------------------------------------------------------------------|----|
|                                                                                                                                  |                                                        |                                                                                           | membranes                                                                                                                     |    |
| Recovery of sulfuric acid from a stone coal acid leaching solution by diffusion dialysis                                         | sulfuric acid from a stone coal acid leaching solution | DF-120-III                                                                                | Process found to be feasible                                                                                                  | 27 |
| Investigation of key process parameters in acid recovery for diffusion dialysis using novel (MDMH-QPPO) anion exchange membranes | HCl/FeCl <sub>2</sub>                                  | methyl 6-(dimethylamino) hexanoate (MDMH) and poly (2, 5-dimethylphenyl oxide) based AEM  | Process parameters studied using full factorial design                                                                        | 28 |
| Quaternized poly(2,6-dimethyl-1,4-phenylene oxide)s with zwitterion groups as diffusion dialysis membranes for acid recovery     | HCl/FeCl <sub>2</sub>                                  | quaternized poly(2,6-dimethyl-1,4-phenylene oxide)s (PPO) anion exchange membranes (AEMs) | Introduction of zwitterionic groups into anion exchange membrane simultaneously improves dialysis coefficient and selectivity | 29 |
| Supplementing multi-functional groups to polysulfone membranes using Azadirachta indica leaves powder for effective              | HCl/FeCl <sub>2</sub>                                  | plant waste (Azadirachta indica, neem leaves powder (NP)) as filler to polysulfone (PSf)  | Performance better than commercial                                                                                            | 30 |

|                                                                                                                 |                       |                                                                                                                                                                       |                                                                                                                             |    |
|-----------------------------------------------------------------------------------------------------------------|-----------------------|-----------------------------------------------------------------------------------------------------------------------------------------------------------------------|-----------------------------------------------------------------------------------------------------------------------------|----|
| and highly selective acid recovery                                                                              |                       | membrane                                                                                                                                                              | membrane s                                                                                                                  |    |
| In-situ crosslinked AEMs with self-assembled nanostructure for acid recovery                                    | HCl/FeCl <sub>2</sub> | tris(2-(2-methoxyethoxy) ethyl) amine (TDA) functionalized bromo poly(2, 6-dimethyl-1, 4 phenylene oxide)                                                             | Membrane s exhibited better operationa l stability for 10 consecutiv e cycles during the entire diffusion dialysis process. | 31 |
| High proton selectivity membrane based on the keto-linked cationic covalent organic framework for acid recovery | HCl/FeCl <sub>2</sub> | keto-linked covalent organic frameworks with high acid-stability was fabricated on the surface of carboxyl-modified polyacrylonitrile (CPAN) ultrafiltration membrane | High separation performan ce after 10 cycle under strong-acid conditions                                                    | 32 |
| Fabrication and characterization of pyridinium functionalized anion exchange membranes for acid recovery        | HCl/FeCl <sub>2</sub> | brominated poly (2,6-dimethyl-1,4-phenylene oxide) (BPPO) as a polymer backbone and 4-methylpyridine (MP) based AEM                                                   | Performan ce better than commerci al membrane s                                                                             | 33 |

|                                                                                                                                                       |                                                            |                                                                                                                                    |                                                          |    |
|-------------------------------------------------------------------------------------------------------------------------------------------------------|------------------------------------------------------------|------------------------------------------------------------------------------------------------------------------------------------|----------------------------------------------------------|----|
| Construction of two dimensional anion exchange membranes to boost acid recovery performances                                                          | HCl/FeCl <sub>2</sub>                                      | 2D AEMs were fabricated by layer by layer stacking the graphene oxide nanosheets decorated by imidazolium cations (Im-GO)          | High separation performance after 10 cycle               | 34 |
| Acid-triggered polyether sulfone - Polyvinyl pyrrolidone blend anion exchange membranes for the recovery of titania waste acid via diffusion dialysis | H <sub>2</sub> SO <sub>4</sub> recovery from titania waste | PES (polyether sulfone) - PVP (polyvinyl pyrrolidone) blend membranes                                                              | Permeability coefficient s remain unchanged for 337 days | 35 |
| Prepared poly(aryl piperidinium) anion exchange membranes for acid recovery to improve dialysis coefficients and selectivity                          | HCl/FeCl <sub>2</sub>                                      | self-organized nanostructured cross-linked AEMs based on poly (aryl piperidinium)                                                  | Performance better than commercial membranes             | 36 |
| Polysulfone/graphene quantum dots composite anion exchange membrane for acid recovery by diffusion dialysis                                           | HCl/FeCl <sub>2</sub>                                      | chloromethylated polysulfone membranes are prepared with different concentrations of graphene quantum dots                         | shows potential for acid recovery                        | 37 |
| Novel poly (ionic liquid)-based anion exchange membranes for efficient and rapid acid recovery from industrial waste                                  | HCl/FeCl <sub>2</sub>                                      | poly (ionic liquids)-based AEMs by the free radical polymerization of 1-butyl-3- vinyl imidazolium bromide, acrylic acid, styrene, | Performance better than commercial membrane              | 38 |

|                                                                                                                                                         |                       |                                                                  |                                              |    |
|---------------------------------------------------------------------------------------------------------------------------------------------------------|-----------------------|------------------------------------------------------------------|----------------------------------------------|----|
|                                                                                                                                                         |                       | and acrylonitrile under sunlight                                 | s                                            |    |
| Influence of hydrophobic components tuning of poly(aryl ether sulfone)s ionomers based anion exchange membranes on diffusion dialysis for acid recovery | HCl/FeCl <sub>2</sub> | quaternized poly(arylene ether sulfone)s                         | Performance better than commercial membranes | 39 |
| High-performance porous anion exchange membranes for efficient acid recovery from acidic wastewater by diffusion dialysis                               | HCl/FeCl <sub>2</sub> | porous brominated poly(phenylene oxide) membrane                 | Performance better than commercial membranes | 40 |
| Enhanced diffusion dialysis performance of cross-linked poly(aryl piperidine) anion exchange membranes by thiol-ene click chemistry for acid recovery   | HCl/FeCl <sub>2</sub> | quaternized poly(biphenyl piperidine) polymers based AEMs        | Performance better than commercial membranes | 41 |
| Nanostructured anion exchange membranes based on poly(arylene piperidinium) with bis-cation strings for diffusion dialysis in acid recovery             | HCl/FeCl <sub>2</sub> | AEMs based on poly(arylene piperidinium) with bis-cation strings | Performance better than commercial membranes | 42 |

|                                                                                                                                                           |                                                        |                                                                                                                                                        |                                                           |    |
|-----------------------------------------------------------------------------------------------------------------------------------------------------------|--------------------------------------------------------|--------------------------------------------------------------------------------------------------------------------------------------------------------|-----------------------------------------------------------|----|
| Internally cross-linked poly (2,6-dimethyl-1,4-phenylene ether) based anion exchange membrane for recovery of different acids by diffusion dialysis       | HCl, HNO <sub>3</sub> , H <sub>2</sub> SO <sub>4</sub> | internally crosslinked poly (2,6-dimethyl-1,4-phenylene ether) (PPE) based AEMs                                                                        | Performance better than commercial membranes              | 43 |
| Cationic covalent organic framework membranes with stable proton transfer channel for acid recovery                                                       | HCl/FeCl <sub>2</sub>                                  | acid-stable cationic COF (DhaTGCl) layers with intralayer hydrogen bond on the surface of hydrolytic polyacrylonitrile (HPAN) ultrafiltration membrane | High separation performance after 10 cycle                | 44 |
| Piperazine-functionalized porous anion exchange membranes for efficient acid recovery by diffusion dialysis                                               | HCl/FeCl <sub>2</sub>                                  | porous chloromethyl polyethersulfone (CMPES) membrane modified by 1,4-dimethylpiperazine (DMP)                                                         | Long term excellent thermal stability and acid resistance | 45 |
| Investigation on flexible and thermally crosslinked bis-piperidinium-PPO anion exchange membrane (AEM) for electro-kinetic desalination and acid recovery | HCl/FeCl <sub>2</sub>                                  | Cross-linked membranes prepared using phase di-cationic cross-linking strategy                                                                         | High dialysis coefficient and separation factor           | 46 |
| GO-anchored imidazolium based cross-linked composite anion exchange membranes for the enhancement in acid                                                 | HCl/FeCl <sub>2</sub>                                  | graphene oxide (GO) into N-alkylated polyacrylonitrile-co-polyvinyl imidazole copolymer based AEMs                                                     | High dialysis coefficient and separation                  | 47 |

|                                                                                                                   |                       |                                                                 |                                                  |    |
|-------------------------------------------------------------------------------------------------------------------|-----------------------|-----------------------------------------------------------------|--------------------------------------------------|----|
| recovery via diffusion dialysis                                                                                   |                       |                                                                 | factor                                           |    |
| Engineering robust RGO/PVA composite membrane for acid recovery via electron beam irradiation                     | HCl/FeCl <sub>2</sub> | graphene oxide (GO) and polyvinyl alcohol (PVA) based membranes | Performance comparable to commercial membranes   | 48 |
| Crosslinking imidazolium-intercalated GO membrane for acid recovery from low concentration solution               | HCl/FeCl <sub>2</sub> | crosslinked imidazolium intercalated GO membrane                | Recovery feasible with the synthesized membranes | 49 |
| Constructing proton selective pathways using MOFs to enhance acid recovery efficiency of anion exchange membranes | HCl/FeCl <sub>2</sub> | AEMs based on metalorganic frameworks                           | Recovery feasible with the synthesized membranes | 50 |
| Chemically stable and high acid recovery anion exchange membrane                                                  | HCl/FeCl <sub>2</sub> | N-methyl-4-piperidone (NMPi) based thermoset AEMs               | Recovery feasible with the synthesized membranes | 51 |



**Table S2.** The advantages and `disadvantages of the standalone remediation and recycling methods.

| <b>Technology</b>   | <b>Method</b>                              | <b>Advantages</b>                                                                                             | <b>Disadvantages</b>                                                                                                                                                                                                |
|---------------------|--------------------------------------------|---------------------------------------------------------------------------------------------------------------|---------------------------------------------------------------------------------------------------------------------------------------------------------------------------------------------------------------------|
| Remediation method  | Neutralization and Precipitation           | Simple and inexpensive, suited for low acidity aqueous waste, large volume can be treated                     | Insufficient for zero waste discharge due to presence of toxic metal ions, slow precipitation and sedimentation, formation of watery sludge or secondary waste                                                      |
|                     | Pyrohydrolysis                             | Specific to spent pickle liquor or similar type of aqueous waste                                              | Insufficient for zero waste discharge, energy intensive, generation off toxic gases, secondary waste formation                                                                                                      |
|                     | Thermal decomposition/ bio-denitrification | Simple and very effective method, suited for low acidity and low volume.                                      | Insufficient for zero waste discharge, Possibility of significant amount of energy consumption, generation of toxic gases, secondary waste formation, and large volume treatment of aqueous waste is not feasible.  |
|                     | Coagulation and flocculation               | Simple, economical and does not require separate unit, often coupled with precipitation.                      | Secondary waste generation, incomplete metal ions removal, may need pH control to remove metal ions.                                                                                                                |
|                     | Crystallization                            | Crystallization is an effective way to get rid of ferrous chloride in water after hydrochloric acid pickling. | The crystallization requires considerable energy, it is challenging to remove from the waste acids strong metallic ions like Fe ions, there isn't a economically viable way to handle the crystal that was removed. |
| Regeneration method | Solvent extraction                         | Acid can be selectively removes with appropriate extractant                                                   | Requires special plants, high purity acid may not be achieved, capital intensive, does not suit to low water consumption and zero waste discharge.                                                                  |
|                     | Ion-exchange                               | Selective for ions removal, large volume can be processes                                                     | High purity acid not recovered, large volume of aqueous waste may generate, does not suit to low water consumption and zero waste discharge                                                                         |
| Membrane technology | Nanofiltration and Reverse                 | High purity water can be obtained from RO,                                                                    | RO may be suited for concentrating aqueous waste                                                                                                                                                                    |

|  |                       |                                                                                               |                                                                                                                                                                                                                                                                                                            |
|--|-----------------------|-----------------------------------------------------------------------------------------------|------------------------------------------------------------------------------------------------------------------------------------------------------------------------------------------------------------------------------------------------------------------------------------------------------------|
|  | Osmosis               | NF can separate acid from multivalent metal ions. Process is faster than any other membrane   | not acid recovery, NF membranes are not stable in high acidic condition, and high purity acid is not recovered. Zero waste discharge not possible due to the presence of metal ions in the rejected water.                                                                                                 |
|  | Membrane Distillation | Well suited for recovery of high purity water from acidic waste, low waste heat utilization   | HCl can vaporize and pass through membrane with water, not suited for recovery of acid from the waste.                                                                                                                                                                                                     |
|  | Diffusion dialysis    | High purity acid can be recovered and recycled, low energy consumption, economical and simple | Process is slow and only 50% acid from feed can be recovered.                                                                                                                                                                                                                                              |
|  | Electrodialysis       | With monovalent selective membrane, electrodialysis can separate acid from aqueous waste      | Well suited for the salt removal, and H <sup>+</sup> -ions selective cation exchange membrane is required, proton leakage through anion-exchange membrane is problem, and reverse flow of water is also problem, if concentration difference is higher between two compartments separated by the membrane. |

## References

1. T.W. Xu, Ion exchange membranes: state of their development and perspective, *J. Membr. Sci.*, 2005, **263**, 1–29.
2. V. Chavan, C. Agarwal, V.C. Adya, A. K. Pandey, Hybrid organic-inorganic anion-exchange pore-filled membranes for the recovery of nitric acid from highly acidic aqueous waste streams, *Water Res.*, 2018, **133**, 87-98.
3. D.M. Stachera, R.F. Childs, Tuning the acid recovery performance of poly(4-vinylpyridine)-filled membranes by the introduction of hydrophobic groups, *J. Membr. Sci.*, 2001, **187**, 213-225.
4. X. Lin, E.Shamsaei, B. Kong, J. Z. Liu, T. Xu, H. Wang, Fabrication of asymmetrical diffusion dialysis membranes for rapid acid recovery with high purity, *J. Mater. Chem. A*, 2015, **3**, 24000-24007.
5. K. Emmanuel, C. Cheng, B. Erigene, A.N. Mondal, Md. M. Hossain, M.I. Khan, N.Ul Afsar, G. Liang, L. Wu, T. Xu, Imidazolium functionalized anion exchange membrane blended with PVA for acid recovery via diffusion dialysis process, *J. Membr. Sci.*, 2016, **497**, 209-215.
6. H. Hu, W. Song, One-step fabrication of methylthiazole-functionalized anion exchange membranes for diffusion dialysis, *Open J. Phys. Chem.*, 2018, **8**, 100-109.
7. J. Lin, X. Dan, J. Wang, S. Huang, L. Fan, M. Xie, S. Zhao, X. Lin, In-situ cross-linked porous anion exchange membranes with high performance for efficient acid recovery, *J. Membr. Sci.*, **2023**, 673, 121499.
8. D.-H. Kim, H.-S. Park, S.-J. Seo, J.-S. Park, S.-H. Moon, Y.-W. Choi, Y.S. Jiong, D. H. Kim, M.-S. Kang, Facile surface modification of anion-exchange membranes for improvement of diffusion dialysis performance, *J. Coll. Interf. Sci.*, **2014**, 416, 19-24.
9. C. Wei, X. Li, Z. Deng, G. Fan, M. Li, C. Li, Recovery of H<sub>2</sub>SO<sub>4</sub> from an acid leach solution by diffusion dialysis, *J. Hazard. Mater.*, **2010**, 176, 226-230.
10. J. Xu, S. Lu, D. Fu, Recovery of hydrochloric acid from the waste acid solution by diffusion dialysis, *J. Hazard. Mater.*, **2009**, 165, 832-837.
11. W. Li, Y. Zhang, J. Huang, X. Zhu, Y. Wang, Separation and recovery of sulfuric acid from acidic vanadium leaching solution by diffusion dialysis, *Sep. Purif. Technol.*, **2012**, 96, 44-49.

12. P. P. Sharma, V. Yadav, A. Rajput, V. Kulshrestha, Poly (triethoxyvinylsilane-co-quaternaryvinylbenzylchloride)/fGNR based anion exchange membrane and its application towards salt and acid recovery, *J. Membr. Sci.*, 2018, **556**, , 303-311.
13. K. Emmanuel, C. Cheng, A.N. Mondal, B. Erigene, Md. M. Hossain, N. Ul Afsar, M. I. Khan, L. Wu, T. Xu, Covalently cross-linked pyridinium based AEMs with aromatic pendant groups for acid recovery via diffusion dialysis, *Sep. Purif. Technol.*, 2016, **164**, 125-131.
14. J. Xu, D. Fu, S. Lu, The recovery of sulphuric acid from the waste anodic aluminum oxidation solution by diffusion dialysis, *Sep. Purif. Technol.*, 2009, **69**, 168-173.
15. X. Zhang, C. Li, H. Wang, T. Xu, Recovery of hydrochloric acid from simulated chemosynthesis aluminum foil wastewater by spiral wound diffusion dialysis (SWDD) membrane module, *J. Membr. Sci.*, 2011, **384**, 219-225.
16. M.S. Jyothi, S. Yadav, G. Balakrishna, Effective recovery of acids from egg waste incorporated PSf membranes: A step towards sustainable development, *J. Membr. Sci.*, 2018, **549**, 227-235.
17. C. Cheng, Z. Yang, Y. He, A.N. Mondal, E. Bakangura, T. Xu, Diffusion dialysis membranes with semi-interpenetrating network for acid recovery, *J. Membr. Sci.*, 2015, **493**, 645-653.
18. L. Ge, A.N. Mondal, X. Liu, B. Wu, D. Yu, Q. Li, J. Miao, Q. Ge, T. Xu, Advanced charged porous membranes with ultrahigh selectivity and permeability for acid recovery, *J. Membr. Sci.*, 2017, **536**, 11-18.
19. F. Mao, G. Zhang, J. Tong, T. Xu, Y. Wu, Anion exchange membranes used in diffusion dialysis for acid recovery from erosive and organic solutions, *Sep. Purif. Technol.*, 2014, **122**, 376-383
20. J. Ran, M. Hu, D. Yu, Y. He, M.A. Shehzad, L. Wu, T. Xu, Graphene oxide embedded “three-phase” membrane to beat “trade-off” in acid recovery, *J. Membr. Sci.*, 2016, **520**, 630-638.
21. J. Pan, Y. He, L. Wu, C. Jiang, B. Wu, A.N. Mondal, C. Cheng, T. Xu, Anion exchange membranes from hot-pressed electrospun QPPO–SiO<sub>2</sub> hybrid nanofibers for acid recovery. *J. Membr. Sci.*, 2015, **480**, 115-121.
22. X. Lin, E. Shamsaei, B. Kong, J. Z. Liu, Y. Hu, T. Xu, H. Wang, Porous diffusion dialysis membranes for rapid acid recovery, *J. Membr. Sci.*, 2016, **502**, 76-83.

23. M. I. Khan, A. N. Mondal, C. Cheng, J. Pan, K. Emmanuel, L. Wu, T. Xu, Porous BPPO-based membranes modified by aromatic amine for acid recovery, *Sep. Purif. Technol.*, 2016, **157**, 27-34.
24. A. N. Mondal, C. Cheng, Z. Yao, J. Pan, M. M. Hossain, M. I. Khan, Z. Yang, L. Wu, T. Xu, Novel quaternized aromatic amine based hybrid PVA membranes for acid recovery, *J. Membr. Sci.*, 2015, **490**, 29-37.
25. X. Lin, E. Shamsaei, B. Kong, J. Z. Liu, D. Zhao, T. Xu, Z. Xie, C. D. Easton, H. Wang, Asymmetrically porous anion exchange membranes with an ultrathin selective layer for rapid acid recovery, *J. Membr. Sci.*, 2016, **510**, 437-446.
26. A. N. Mondal, C. Cheng, M. I. Khan, M. M. Hossain, K. Emmanuel, L. Ge, B. Wu, Y. He, J. Ran, X. Ge, N. U. Afsar, L. Wu, T. Xu, Improved acid recovery performance by novel poly(DMAEM-co- $\gamma$ -MPS) anion exchange membrane via diffusion dialysis, *J. Membr. Sci.*, 2017, **525**, 163-174.
27. K. Wang, Y. Zhang, J. Huang, T. Liu, J. Wang, Recovery of sulfuric acid from a stone coal acid leaching solution by diffusion dialysis, *Hydrometallurgy*, 2017, **173**, 9-14.
28. M. Irfan, N. Ul Afsar, Y. Wang, T. Xu, Investigation of key process parameters in acid recovery for diffusion dialysis using novel (MDMH-QPPO) anion exchange membranes, *J. Taiwan Institute Chem. Engin.*, 2018, 93, 405-413.
29. X. Zhang, F. Zhang, M. Liu, Y. Wang, Z. Xu, N. Li, Quaternized poly(2,6-dimethyl-1,4-phenylene oxide)s with zwitterion groups as diffusion dialysis membranes for acid recovery, *Sep. Purif. Technol.*, 2020, **250**, 117267.
30. S. Yadav, K. Soontarapa, Jyothi M.S., M. Padaki, R. G. Balakrishna, J.-Y. Lai, Supplementing multi-functional groups to polysulfone membranes using Azadirachta indica leaves powder for effective and highly selective acid recovery, *J. Hazard. Mater.*, 2019, **369**, 1–8.
31. W. Jia, X. Ge, N. Ul Afsara, Z. Zhao, B. Wub, W. Song, Y. He, L. Ge, T. Xua, In-situ crosslinked AEMs with self-assembled nanostructure for acid recovery, *Sep. Purif. Technol.*, 2020, **247**, 116927.
32. C. Yang, L. Hou, Z. Yao, J. Zhao, L. Hou, Z. Lin, High proton selectivity membrane based on the keto-linked cationic covalent organic framework for acid recovery, *J. Membr. Sci.*, 2021, **640**, 119800.
33. M.I. Khan, M. Khraisheh, F. Almomani, Fabrication and characterization of pyridinium functionalized anion exchange membranes for acid recovery, *Sci. Total Environ.*, 2019, **686**, 90-96.

34. P. Zhang, Y. Wu, W. Liu, P. Cui, Q. Huang, J. Ran, Construction of two dimensional anion exchange membranes to boost acid recovery performances, *J. Membr. Sci.*, 2021, **618**, 118692.
35. Y. Zhang, G. Song, T. Luo, X. Yang, H. Ren, X. Wang, Z. Zhang, Acid-triggered polyether sulfone - Polyvinyl pyrrolidone blend anion exchange membranes for the recovery of titania waste acid via diffusion dialysis, *J. Membr. Sci.*, 2022, **662**, 120980.
36. X. Du, Z. Wang, H. Zhang, Y. Yuan, H. Wang, Z. Zhang, Prepared poly(aryl piperidinium) anion exchange membranes for acid recovery to improve dialysis coefficients and selectivity, *J. Membr. Sci.*, 2021, **619**, 118805.
37. V. Yadav, S. K. Raj, N.H. Rathod, V. Kulshrestha, .3Polysulfone/graphene quantum dots composite anion exchange membrane for acid recovery by diffusion dialysis, *J. Membr. Sci.*, 2020, 611, 118331.
38. N. S. Naik, M. Padaki, Sébastien Déon, D. H. K. Murthy, Novel poly (ionic liquid)-based anion exchange membranes for efficient and rapid acid recovery from industrial waste, *Chem. Eng. J.*, 2020, **401**, 126148.
39. C. Chen, H. Xie, Y. Jiang, Y. Chen, Y. Liang, G. Ruzetuohti, S. Liao, X. Li, B. Wei, Influence of hydrophobic components tuning of poly (aryl ether sulfone) ionomers based anion exchange membranes on diffusion dialysis for acid recovery, *J. Membr. Sci.*, 2021, **636**, 119562.
40. J. Lin, J. Huang, J. Wang, J. Yu, X. You, X. Lin, B. V. der Bruggen, S. Zhao, High-performance porous anion exchange membranes for efficient acid recovery from acidic wastewater by diffusion dialysis, *J. Membr. Sci.*, 2021, **624**, 119116.
41. B. Liu, T. Li, Q. Li, S. Zhu, Y. Duan, J. Li, H. Zhang, C. Zhao, Enhanced diffusion dialysis performance of cross-linked poly(aryl piperidine) anion exchange membranes by thiol-ene click chemistry for acid recovery, *J. Membr. Sci.*, 2022, **660**, 120816.
42. B. Liu, Y. Duan, T. Li, J. Li, H. Zhang, C. Zhao, Nanostructured anion exchange membranes based on poly(arylene piperidinium) with bis-cation strings for diffusion dialysis in acid recovery, *Sep. Purif. Technol.*, 2022, **282**, 120032.
43. J. Sharma, S. K. Misra, V. Kulshrestha, Internally cross-linked poly (2,6-dimethyl-1,4-phenylene ether) based anion exchange membrane for recovery of different acids by diffusion dialysis, *Chem. Eng. J.*, 2021, **414**, 128776.
44. C. Yang, L. Hou, J. Zhao, Z. Yao, G. Li, L. Zhang, L. Hou, Cationic covalent organic framework membranes with stable proton transfer channel for acid recovery, *Chem. Eng. J.*, 2022, **428**, 131124.

45. X. You, J. Chen, S. Pan, G. Lu, L. Teng, X. Lin, S. Zhao, J. Lin, Piperazine-functionalized porous anion exchange membranes for efficient acid recovery by diffusion dialysis, *J. Membr. Sci.*, 2022, **654**, 120560.
46. J. Sharma, S. Mishra, N.H. Rathod, V. Kulshrestha, Investigation on flexible and thermally crosslinked bis-piperidinium-PPO anion exchange membrane (AEM) for electro-kinetic desalination and acid recovery, *J. Membr. Sci.*, 2022, **664**, 121082.
47. A. Choudhury, P. Patnaik, R. Mondal, S. Sarkar, Uma Chatterjee, GO-anchored imidazolium based cross-linked composite anion exchange membranes for the enhancement in acid recovery via diffusion dialysis, *Chem. Eng. J.*, 2023, **451**, 138901.
48. Y. Gu, J. Zhao, H. Zhou, H. Jiang, J. Li, B. Zhang, Engineering robust RGO/PVA composite membrane for acid recovery via electron beam irradiation, *Carbon*, 2022, **191**, 243-254.
49. Y. Gu, J. Zhao, H. Zhou, H. Jiang, J. Li, B. Zhang, H. Ma, Crosslinking imidazolium-intercalated GO membrane for acid recovery from low concentration solution, *Carbon*, 2021, **183**, 830-839.
50. T. Deng, X. Zeng, C. Zhang, Y. Wang, W. Zhang, Constructing proton selective pathways using MOFs to enhance acid recovery efficiency of anion exchange membranes, *Chem. Eng. J.*, 2022, **445**, 136752.
51. C. M. Pawar, S. Sreenath, V. Dave, P. P. Bavdane, V. Singh, V. Verma, R.K. Nagarale, Chemically stable and high acid recovery anion exchange membrane, *Polymer*, 2022, **251**, 124915.
